# Supplementary material
Source: publisher figshare collection journal article supplement (https://future-science-group.figshare.com/articles/dataset/_/22350478)
Supplement: Supplementary file [file 1]

## **The Impact of Covid-19 on Women Seeking a Womb Transplant**

### **Questionnaire (V2 – 05/03/21)**

**Full title: The impact of Covid-19 on the motivations of women seeking a womb transplant.**

Please complete the following questionnaire after reading the participant information sheet

#### **Consent**

1. I confirm that I have read and understand the participant information leaflet (V2 05-03-21) have had the opportunity to consider the information. ☐
2. I understand that my participation is voluntary and that I am free to withdraw before submitting the questionnaire without giving any reason, without my legal rights being affected. ☐
3. I understand that the information collected may be used to support other research in the future, and may be shared anonymously with other researchers. ☐
4. I confirm I am aged over 16 years ☐
5. I agree to take part in the above study. ☐

## Section 1: Demographic details

### Demographic information

1) Age (years) .....

2) Ethnicity

- |                      |                          |
|----------------------|--------------------------|
| White                | <input type="checkbox"/> |
| Asian                | <input type="checkbox"/> |
| Black                | <input type="checkbox"/> |
| Mixed                | <input type="checkbox"/> |
| Other                | <input type="checkbox"/> |
| Would rather not say | <input type="checkbox"/> |

3) Educational attainment: please select the highest level of qualification you hold:

No formal qualification ☐

Level 1 (1-4 GCSEs, Scottish Standard Grade or equivalent qualifications). ☐

Level 2 (5 + GCSEs, Scottish Higher, Scottish Advanced Higher or equivalent qualifications). ☐

Apprenticeship (Apprenticeships (England, Wales and Northern Ireland only). ☐

Level 3 (2 + A-levels, , HNC, HND, SVQ level 4 or equivalent qualifications). ☐

Level 4 or above (First or higher degree, professional qualifications or other equivalent higher education qualifications). ☐

Other qualifications (Other vocational / work related qualifications and non-UK / foreign qualifications (England, Wales and Northern Ireland only). ☐

4) Employment status

- |                      |                          |
|----------------------|--------------------------|
| Employed (Full time) | <input type="checkbox"/> |
| Employed (Part time) | <input type="checkbox"/> |
| Self Employed        | <input type="checkbox"/> |
| Student              | <input type="checkbox"/> |
| Housewife            | <input type="checkbox"/> |
| Unemployed           | <input type="checkbox"/> |
| Would rather not say | <input type="checkbox"/> |

**5) Religion**

- Christian ☐  
Muslim ☐  
Hindu ☐  
Other ☐  
Atheist ☐  
Would rather not say ☐

**6) Relationship status**

- Single ☐  
Living with partner ☐  
Married ☐  
Divorced ☐  
Separated ☐  
Widowed ☐  
Would rather not say ☐

**7) What is the cause of your womb related infertility**

- I have been diagnosed with MRKH ☐  
Hysterectomy for the treatment of cancer ☐  
Hysterectomy for the treatment of gestational trophoblastic disease ☐  
Hysterectomy following heavy bleeding at caesarean section ☐  
Hysterectomy for the treatment of fibroids ☐  
Severely scarred womb (Ashermans syndrome) ☐

**8) Do you have children?**

- Yes ☐ How many? .....  
Adaption Yes ☐ No ☐  
Surrogate Yes ☐ No ☐  
Biological Yes ☐ No ☐

No ☐

**9) Medical history**

Do you have any medical problems we should be aware of? Yes ☐ No ☐

If yes, please detail below:

Have you previously had cancer? Yes ☐ No ☐

If yes, please detail below:

Do you have any mental health issues we should be aware of?

Yes ☐

No ☐

If yes, please detail below:

**10) Relationship status**

Single ☐

In a relationship ☐ <1yr ☐ 1-2years ☐ 3-4 years ☐ 5+years ☐

## **Section 2: The impact of Covid-19 on your desire for a womb transplant.**

**11) Which of the following options are you planning or actively pursuing?**  
*(tick all that apply)*

Womb transplant ☐

Surrogacy ☐

Adoption ☐

None ☐

**12) Are you still considering a womb transplant?**

Yes ☐

No ☐

Undecided ☐

**13) What impact has the pandemic had on your desire for a pregnancy?**

More motivated ☐

Less motivated ☐

No change ☐

**With regards to surrogacy:**

**14) I feel anxious about the surrogate mother exercising enough caution during her pregnancy**

Strongly agree   ☐   Agree   ☐   Undecided   ☐   Disagree   ☐   Strongly Disagree   ☐

**15) I have changed my plans for pursuing surrogacy due to the risk of Covid-19 in the surrogate mother.**

Strongly agree   ☐   Agree   ☐   Undecided   ☐   Disagree   ☐   Strongly Disagree   ☐

**With regards to adoption:**

**16) I am more likely to pursue adoption following the pandemic due to concerns about the risk of Covid-19 transmission with surrogacy and womb transplantation.**

Strongly agree   ☐   Agree   ☐   Undecided   ☐   Disagree   ☐   Strongly Disagree   ☐

**17) I am less likely to pursue adoption following the pandemic due to concerns about the risk of Covid-19 transmission.**

Strongly agree   ☐   Agree   ☐   Undecided   ☐   Disagree   ☐   Strongly Disagree   ☐

**Regarding the Covid-19 pandemic:**

**18) I am now less motivated in seeking a womb transplant due to the increased risk posed by Covid-19.**

Strongly agree   ☐   Agree   ☐   Undecided   ☐   Disagree   ☐   Strongly Disagree   ☐

**19) There has been no impact on my motivation for a womb transplant**

Strongly agree   ☐   Agree   ☐   Undecided   ☐   Disagree   ☐   Strongly Disagree   ☐

**20) I would like to delay seeking a womb transplant until we are clear of the pandemic**

Strongly agree   ☐   Agree   ☐   Undecided   ☐   Disagree   ☐   Strongly Disagree   ☐

**21) I would like to delay seeking a womb transplant due to concerns regarding the transmission of Covid-19 during pregnancy**

Strongly agree   ☐   Agree   ☐   Undecided   ☐   Disagree   ☐   Strongly Disagree   ☐

**22) My desire for a baby far outweighs the risks of undergoing a womb transplant during the pandemic**

Strongly agree ☐ Agree ☐ Undecided ☐ Disagree ☐ Strongly Disagree ☐

**23) I am worried about the impact of Covid-19 on the baby born following womb transplantation**

Strongly agree ☐ Agree ☐ Undecided ☐ Disagree ☐ Strongly Disagree ☐

**24) I would feel more comfortable pursuing a womb transplant if offered the vaccine**

Strongly agree ☐ Agree ☐ Undecided ☐ Disagree ☐ Strongly Disagree ☐

**25) I would accept to have the Covid-19 vaccine prior to undergoing womb transplantation**

Strongly agree ☐ Agree ☐ Undecided ☐ Disagree ☐ Strongly Disagree ☐

### **Section 3: The impact of Covid-19 on the choice of womb donor**

**26) In seeking a womb transplant which is now your preferred option?**

Living donor ☐

Deceased donor ☐

**27) What was your preferred option prior to the Covid-19 pandemic?**

Living donor ☐

Deceased donor ☐

**28) The risks imposed by Covid-19 have made me less inclined to pursue a directed donor such as a close friend or relative offering to donate their womb.**

Strongly agree ☐ Agree ☐ Undecided ☐ Disagree ☐ Strongly Disagree ☐

**29) I am worried about the risk of Covid-19 transmission with a deceased donor womb.**

Strongly agree ☐ Agree ☐ Undecided ☐ Disagree ☐ Strongly Disagree ☐

**30) Every potential deceased organ donor is being tested for COVID-19 and if they test positive they will not be able to donate. Do you feel comfortable in receiving a deceased donor womb from an individual who has tested negative?**

Strongly agree ☐ Agree ☐ Undecided ☐ Disagree ☐ Strongly Disagree ☐

## **Section 4: The impact of Covid-19 on your fertility treatment**

**If you have applied for fertility treatment:**

**31) How long have you been waiting for an appointment?**

|                |                          |
|----------------|--------------------------|
| ≤ 2 weeks      | <input type="checkbox"/> |
| 3-4 weeks      | <input type="checkbox"/> |
| 5-6 weeks      | <input type="checkbox"/> |
| 7-8 weeks      | <input type="checkbox"/> |
| 9-10 weeks     | <input type="checkbox"/> |
| 11-12 weeks    | <input type="checkbox"/> |
| 12+ weeks      | <input type="checkbox"/> |
| Not applicable | <input type="checkbox"/> |

**32) I am worried about the risk of Covid-19 transmission in seeking fertility treatment**

Strongly agree ☐ Agree ☐ Undecided ☐ Disagree ☐ Strongly Disagree ☐

**33) The pandemic has resulted in delays to my fertility treatment**

Strongly agree ☐ Agree ☐ Undecided ☐ Disagree ☐ Strongly Disagree ☐

**34) The delays caused by the pandemic have resulted in me no longer being eligible for fertility treatment**

Yes ☐ No ☐

**35) I have managed to have my eggs/embryos frozen during the pandemic**

Yes ☐ No ☐

If yes please say which: egg/embryos .....

**36) I have personally decided to put all investigations on hold until the pandemic is over**

Strongly agree ☐ Agree ☐ Undecided ☐ Disagree ☐ Strongly Disagree ☐

**37) I am worried about the delay in fertility treatment resulting in an unsuccessful outcome**

Strongly agree ☐ Agree ☐ Undecided ☐ Disagree ☐ Strongly Disagree ☐

## **Section 5: The impact of Covid-19 on your partners views**

**38) I have a partner** ☐

**I do not have a partner** ☐ *(Please skip to Section 6)*

**39) My partner now feels we should not pursue a womb transplant due to the risk imposed by Covid-19.**

Strongly agree ☐ Agree ☐ Undecided ☐ Disagree ☐ Strongly Disagree ☐

**40) My partner would like to delay seeking a womb transplant until we are clear of the pandemic**

Strongly agree ☐ Agree ☐ Undecided ☐ Disagree ☐ Strongly Disagree ☐

**41) My partner is worried about the risk of Covid-19 transmission in seeking fertility treatment**

Strongly agree ☐ Agree ☐ Undecided ☐ Disagree ☐ Strongly Disagree ☐

**42) My partner feels we should put all investigations on hold until the pandemic is over**

Strongly agree ☐ Agree ☐ Undecided ☐ Disagree ☐ Strongly Disagree ☐

## **Section 6: The impact of Covid-19 on you**

**43) I have previously had a positive Covid-19 test**

Yes ☐ No ☐



**44) If you have previously been affected by Covid-19 do you feel you suffering with any long-term effects?**

Yes ☐ Please state.....

No ☐

Not applicable ☐

**45) Outside of the womb transplant programme, if offered the Covid-19 vaccine would you accept to take it?**

Yes ☐ No ☐ Don't know ☐

**~The end~**
